# Supplementary material for: Cell-Free DNA for Genomic Analysis in Primary Mediastinal Large B-Cell Lymphoma
Source: Diagnostics (Basel). 2022 Jun 28;12(7):1575. doi: 10.3390/diagnostics12071575 (PMC9324191; doi:10.3390/diagnostics12071575)
Supplement: Supplementary file 1 [file diagnostics-12-01575-s001.zip]

Archive with 5 entries (4 files):
- __MACOSX/Supp Files/
- __MACOSX/Supp Files/._diagnostics-1749759 Supp Methods R1.docx
- __MACOSX/Supp Files/._diagnostics-1749759 Supp Tables R1.xlsx
- Supp Files/diagnostics-1749759 Supp Methods R1.pdf
- Supp Files/diagnostics-1749759 Supp Tables R1.xlsx
